2020 | VOLUME 73 | NUMBER 4

# The American Journal of Psychotherapy

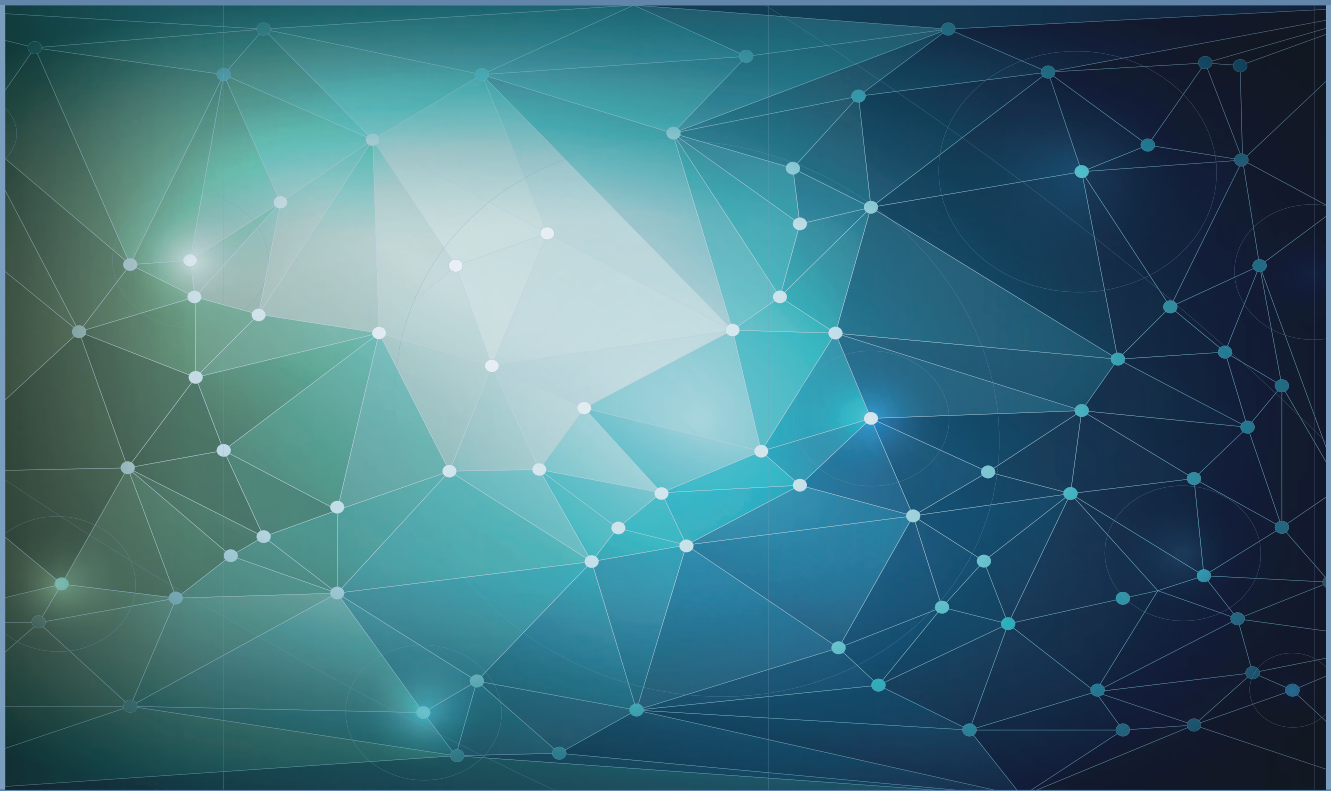

**Special Issue: Consultation-Liaison Psychotherapy**

Guest Editor: Jonathan Hunter, M.D., F.R.C.P.C.

AMERICAN  
PSYCHIATRIC  
ASSOCIATION

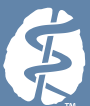

[psychotherapy.psychiatryonline.org](http://psychotherapy.psychiatryonline.org)
